# Supplementary material
Source: Springer Nature journal article supplement (https://www.springermedizin.de/resource/supplementary/13020_2008_46_MOESM10_ESM.pdf/9640862)

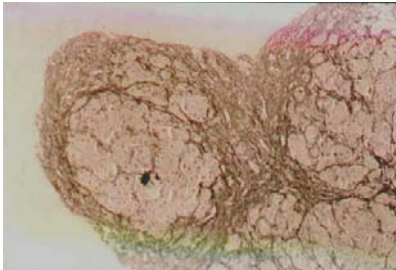

A

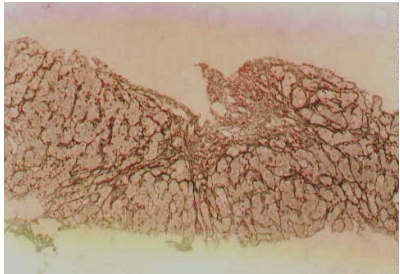

B

Supplement: MOESM10 [file 9640862]
